# Supplementary material for: MOF-coated upconversion nanoconstructs for synergetic photo-chemodynamic/oxygen-elevated photodynamic therapy
Source: Royal Society of Chemistry journal article supplement (doi:10.1039/d2dt02441a), 2022-01-01
Supplement: d2dt02441a1.pdf [file d2dt02441a1.pdf]

## Supporting Information

### **MOF-coated upconversion nanoconstructs for synergetic photo-chemodynamic/oxygen-elevated photodynamic therapy**

Huiyuan Chu,<sup>†a,b</sup> Yameng Li,<sup>†a</sup> Chaozhan Wang,<sup>a</sup> Ji-Wei Shen<sup>\*a</sup> and Yinmao Wei<sup>\*a</sup>

<sup>a</sup> Key Laboratory of Synthetic and Natural Functional Molecule of the Ministry of Education, College of Chemistry & Materials Science, Northwest University, Xi'an 710127, P. R. China.

<sup>b</sup> Department of Ecology and Resource Engineering, Hetao College, Bayannur, 015000, P. R. China

<sup>†</sup> These authors contributed equally to this work.

<sup>\*</sup> Corresponding authors. E-mail: [jiweish@nwu.edu.cn](mailto:jiweish@nwu.edu.cn); [ymwei@nwu.edu.cn](mailto:ymwei@nwu.edu.cn).

## List of Abbreviations in This Study

| Full Name                                                              | Abbreviations |
|------------------------------------------------------------------------|---------------|
| Chlorin e6                                                             | Ce6           |
| Triethoxy(1H,1H,2H,2H-nonafluorohexyl)silane                           | TFS           |
| NaYbF <sub>4</sub> :Tm/Gd@NaGdF <sub>4</sub> :Nd/Yb@NaLuF <sub>4</sub> | UC            |
| UC@mSiO <sub>2</sub>                                                   | US            |
| UC@Ce6@mSiO <sub>2</sub>                                               | UCS           |
| UC@Ce6/TFS@mSiO <sub>2</sub>                                           | UCTS          |
| UC@Ce6/TFS@mSiO <sub>2</sub> @MIL-100 (Cu/Fe)                          | UCTSCF        |

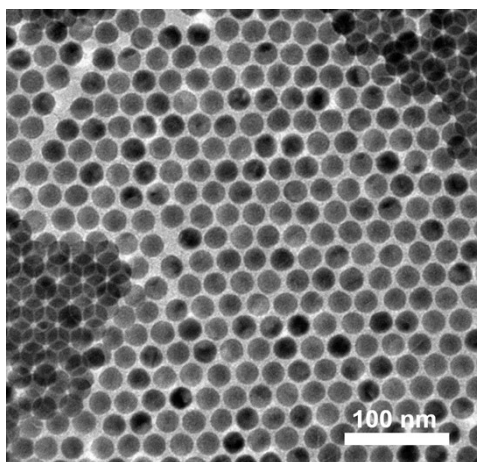

**Fig. S1** TEM image of the NaYbF<sub>4</sub>:Tm/Gd(1/30%).

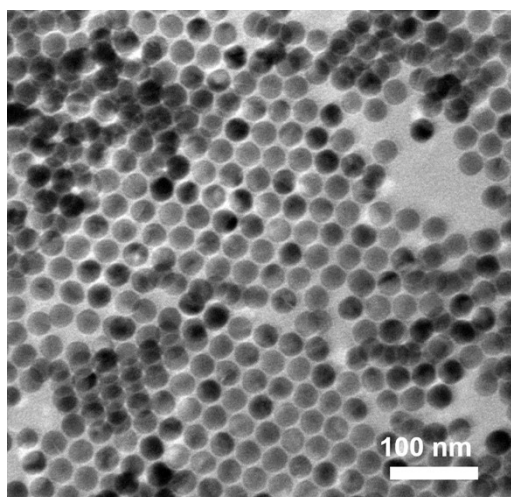

**Fig. S2** TEM image of the NaYbF<sub>4</sub>:Tm/Gd(1/30%)@NaGdF<sub>4</sub>:Nd/Yb(30/10%).

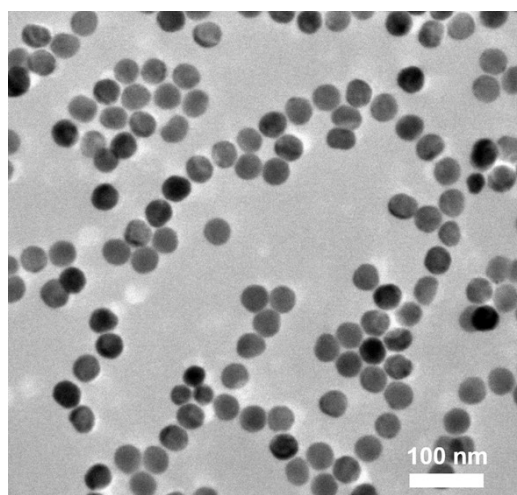

**Fig. S3** TEM image of the UC.

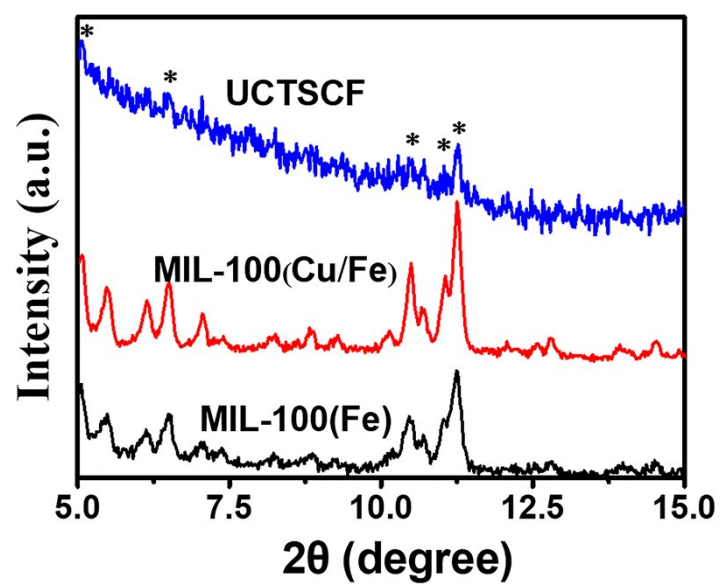

**Fig. S4** X-ray diffraction patterns of the MIL-100(Fe), MIL-100(Cu/Fe) and UCTSCF.

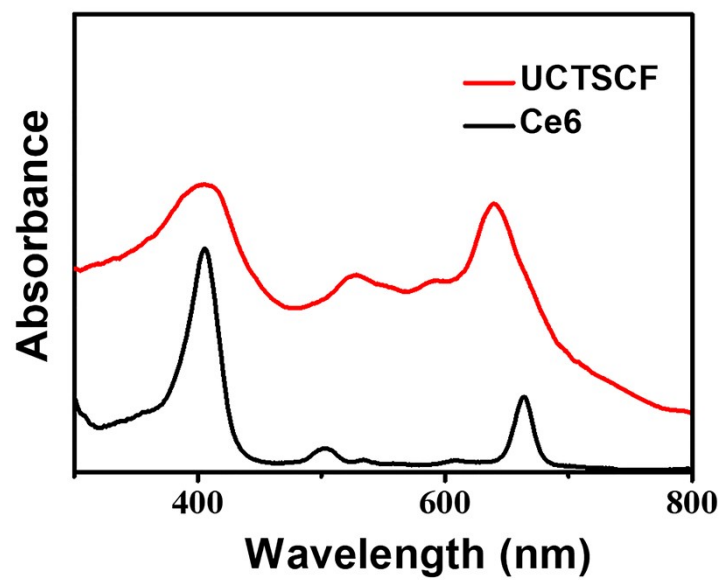

**Fig. S5** UV-vis absorption spectra of Ce6 and the UCTSCF.

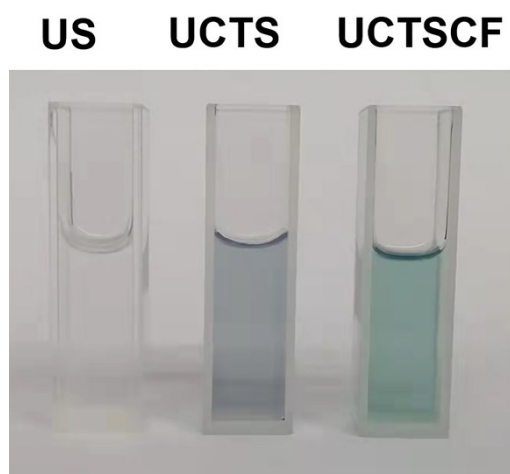

**Fig. S6** Digital images of water suspensions of the US, UCTS and UCTSCF.

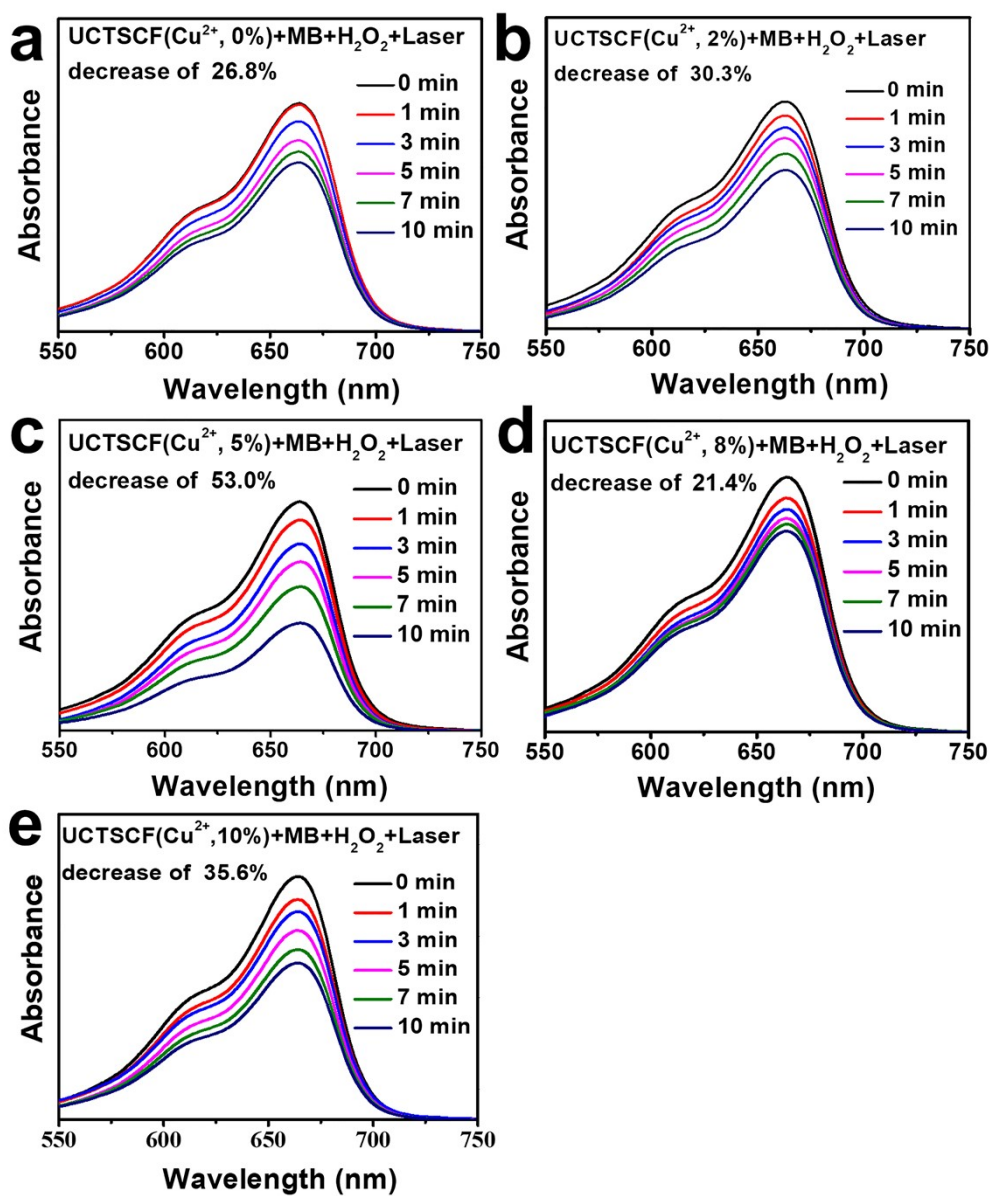

**Fig. S7** The effect of UCTSCF's Cu content on their MB depletion capacity at pH 5.5 in the presence of H<sub>2</sub>O<sub>2</sub> (100 mM) and 808 nm irradiation.

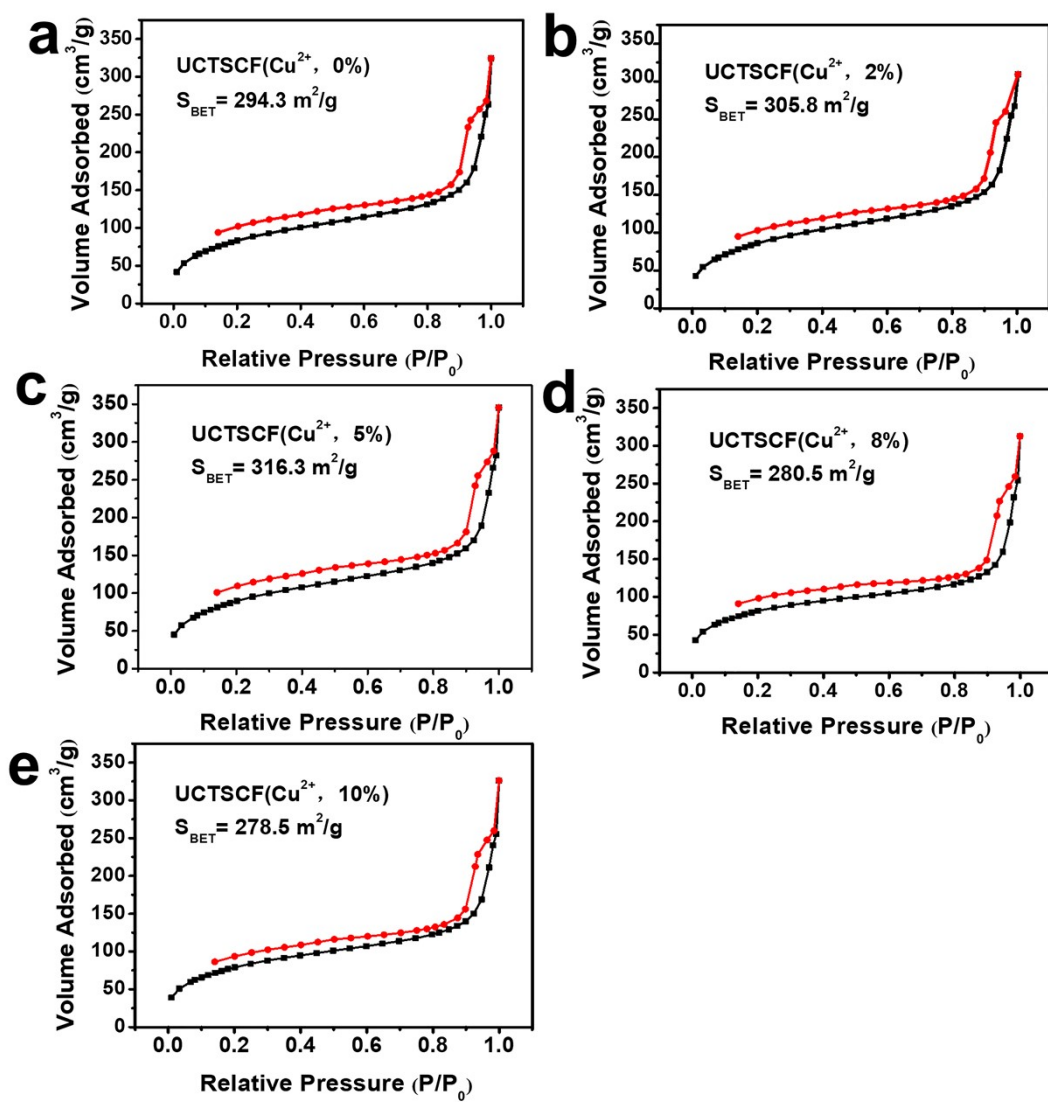

Fig. S8 Surface area of UCTSCF containing different Cu contents.

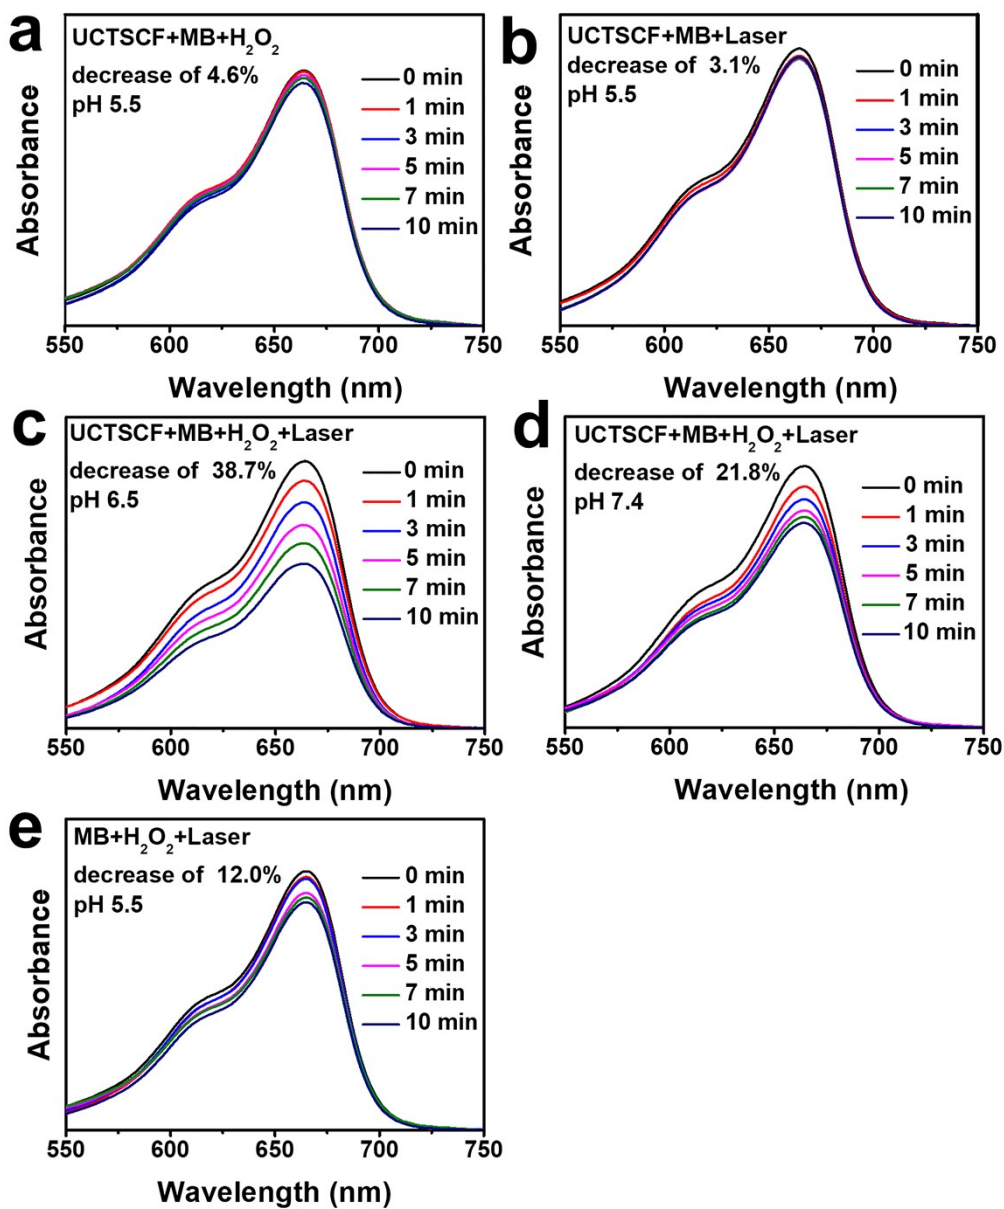

**Fig. S9** Depletion of MB by the optimized UCTSCF with H<sub>2</sub>O<sub>2</sub> (100 mM) but without 808 nm irradiation (a), with 808 nm irradiation but without H<sub>2</sub>O<sub>2</sub> (b), and with both H<sub>2</sub>O<sub>2</sub> (100 mM) and 808 nm irradiation at different pH (c-d). (e) Depletion of MB in the absence of UCTSCF.

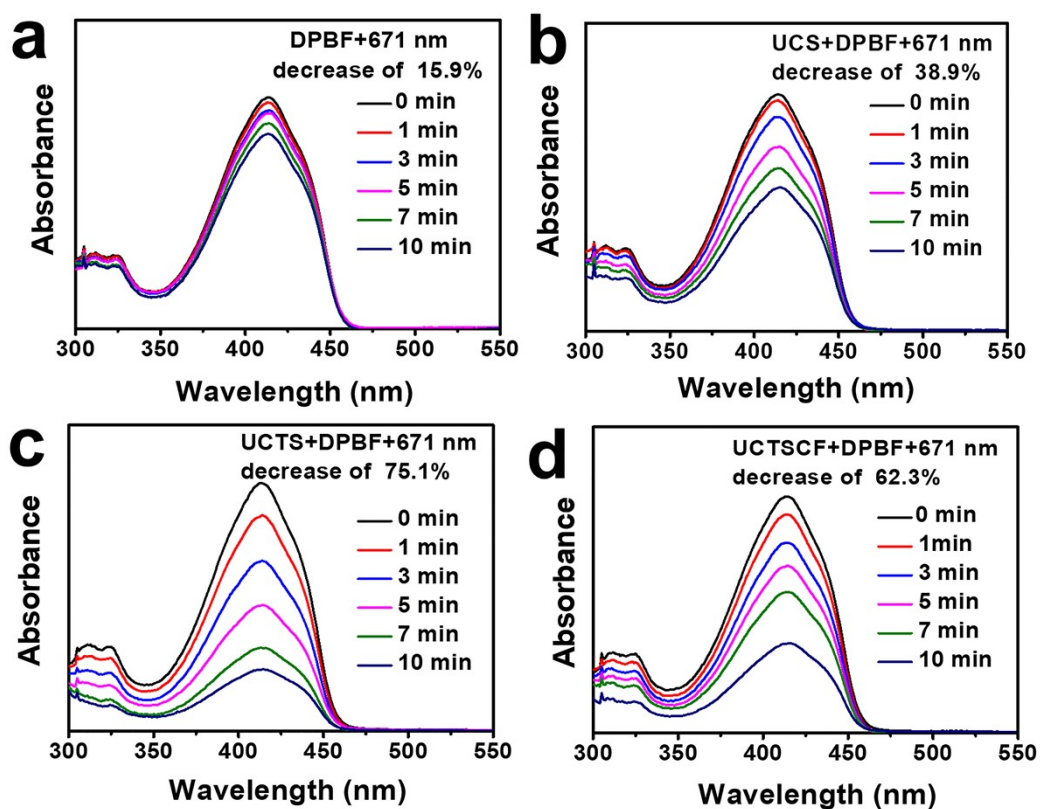

**Fig. S10** Depletion of DPBF by single 671 nm irradiation (a), both UCS and the 671 nm irradiation (b), both UCTS and the 671 nm irradiation (c), and both UCTSCF and the 671 nm irradiation (d).

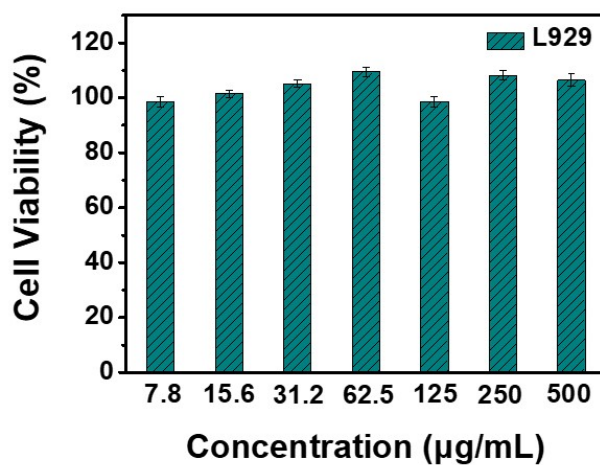

**Fig. S11** Cell viability of L929 incubated with UCTSCF (24 h).
